# Supplementary material
Source: publisher figshare collection journal article supplement (https://acs.figshare.com/ndownloader/files/14072285)
Supplement: Supplementary file 1 [file 14072285]

## **Conjugated Polymer Nanoparticles Having Modified Band Gaps Assembled into Nano- and Micro-Patterned Organic Light Emitting Diodes**

Maura Herrera,<sup>‡</sup> Mohammad Abdul-Moqueet,<sup>±</sup> Mahmoud A. Mahmoud,<sup>‡,†,±\*</sup>

*Chemical Engineering, Department of Biomedical Engineering,<sup>‡</sup> Department of Chemistry<sup>†</sup> Department of Physics and Astronomy,<sup>±</sup> the University of Texas at San Antonio, One UTSA Circle, San Antonio, TX 78249*

\* E-mail: [mahmoud.abdelwahed@UTSA.edu](mailto:mahmoud.abdelwahed@UTSA.edu)

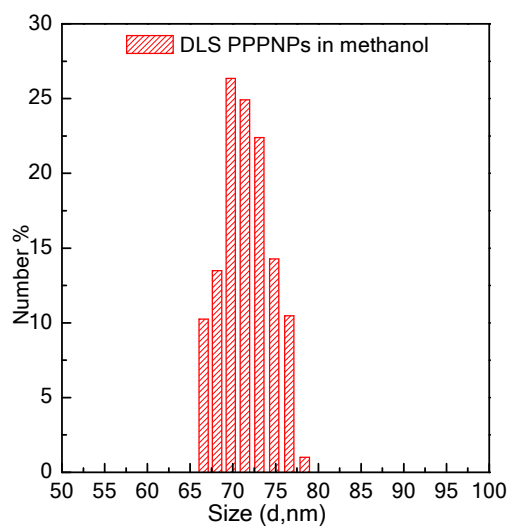

Figure S1: Hydrodynamic radius of PPP-NPs dispersed in methanol measured by DLS technique.

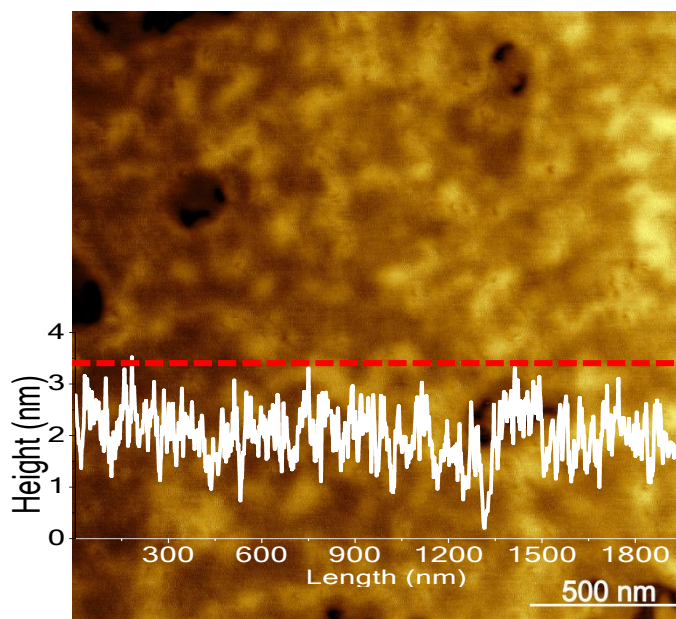

Figure S2: AFM image of PPP-NPs thin film prepared on the surface of a glass substrate by spin coating technique.

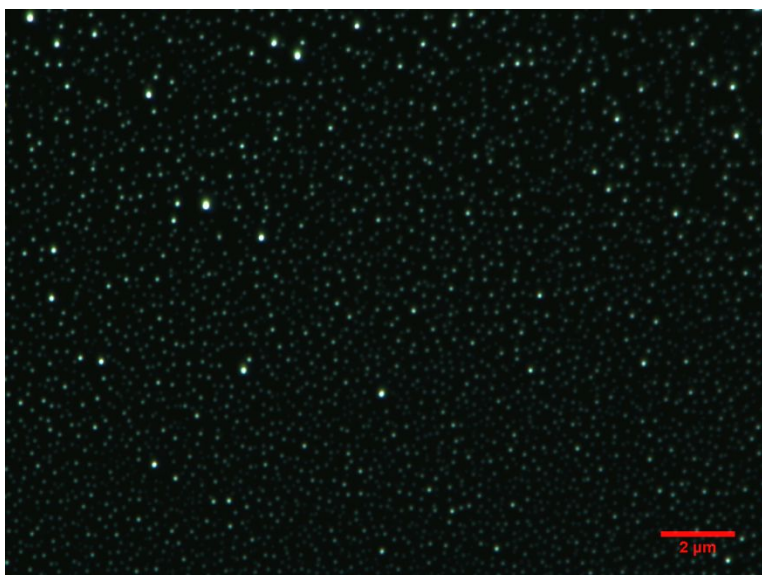

Figure S3: Optical image of the PPP-NPs monolayer assembly transferred to the surface of a glass substrate at surface pressure of 0.07 mN/m

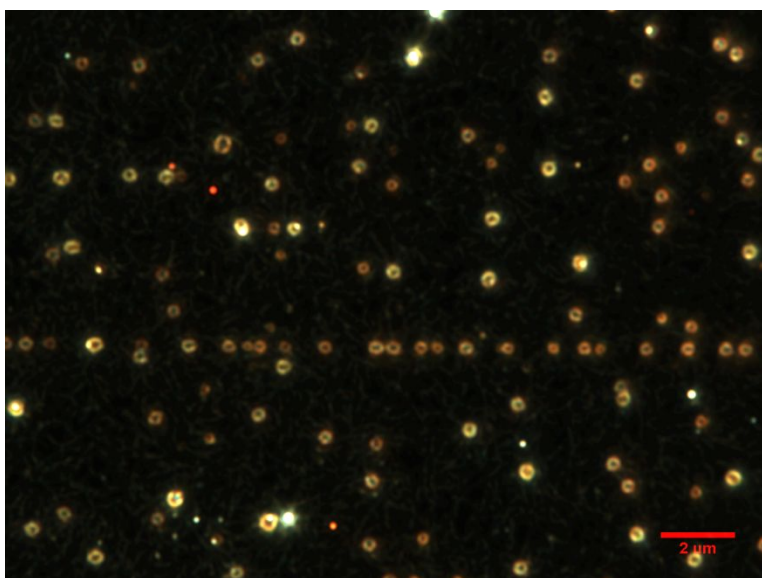

Figure S4: Optical image of the PPP-NPs hierarchically assembly into microdisks by LB technique, the PPP-NPs transferred to the surface of a glass substrate at surface pressure of 2 mN/m.

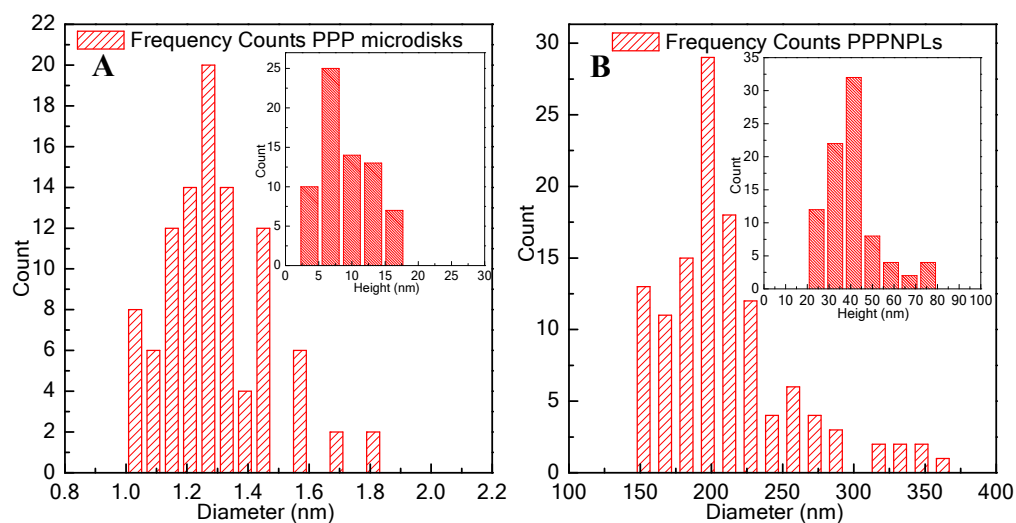

Figure S5: Statistical analysis of the diameter and height (inset) of: A) PPP-MDs, B) PPP-NPLs obtained from AFM images.

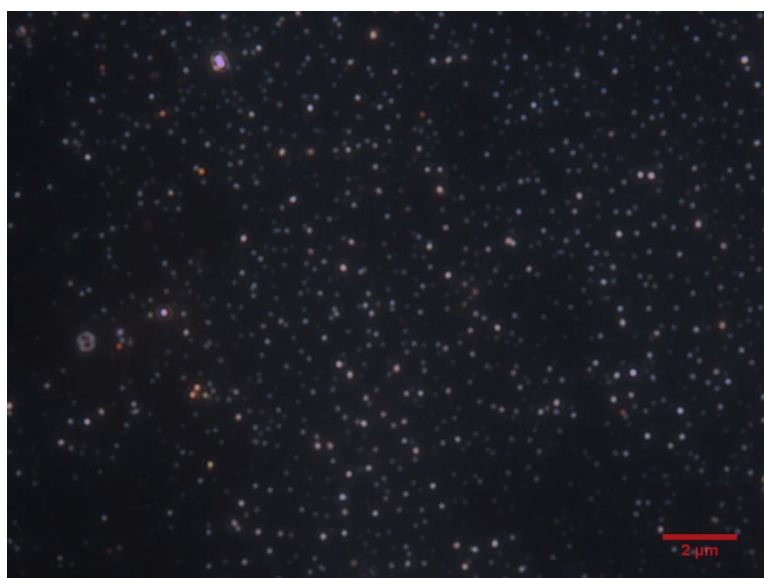

Figure S6: Optical image of the PPP nanopillars on the surface of a glass substrate

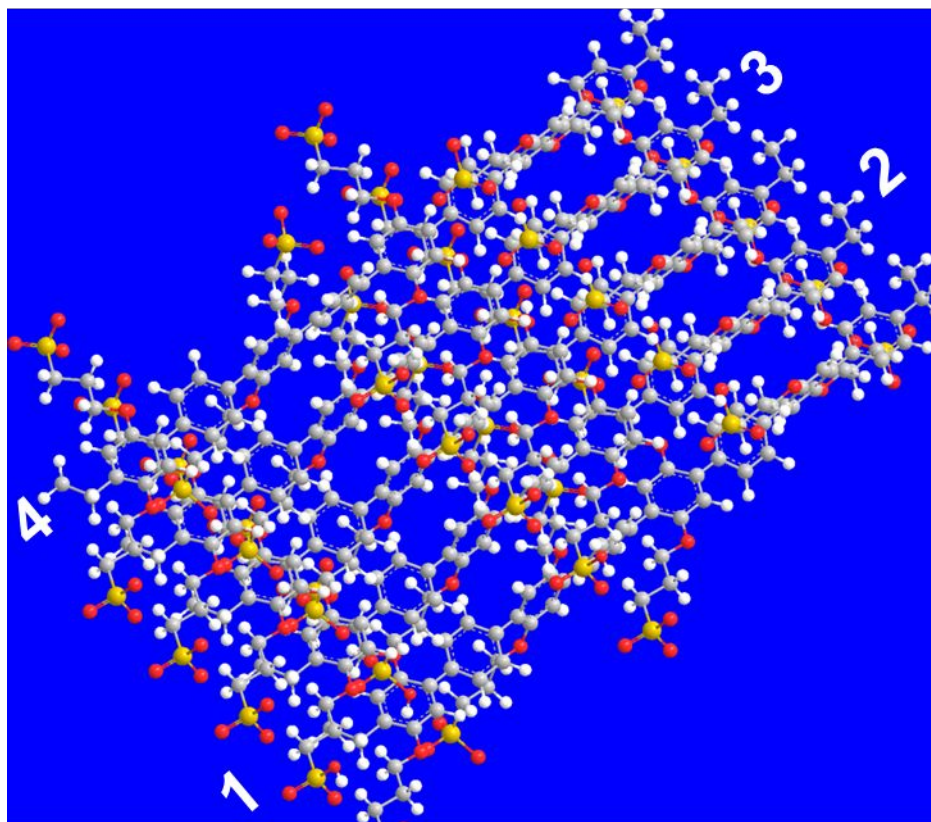

Figure S7: Generated diagram depicting four PPP polymer chains undergoing  $\pi$ - $\pi$  stacking
